# Supplementary material for: 2,6-Diphenyl- and -distyryl-capped 3,7-dialkoxybenzo[1,2-b:4,5-b′]dithiophenes and their dithieno-annulated higher homologs: structural phase transition with enhanced charge carrier mobility
Source: Royal Society of Chemistry journal article supplement (doi:10.1039/c4cp03002h), 2014-07-25

## Electronic Supplementary Information for:

**2,6-Diphenyl- and -distyryl-capped 3,7-dialkoxybenzo[1,2-*b*:4,5-*b'*]dithiophenes and their dithieno-annulated higher homologs: Structural phase transition with enhance charge carrier mobility**

**Sojiro Minami,<sup>a</sup> Marina Ide,<sup>a</sup> Koji Hirano,<sup>a</sup> Tetsuya Satoh,<sup>a</sup> Tsuneaki Sakurai,<sup>a</sup> Kenichi Kato,<sup>b</sup> Masaki Takata,<sup>b</sup> Shu Seki<sup>a,\*</sup> and Masahiro Miura<sup>a,\*</sup>**

<sup>a</sup> *Department of Applied Chemistry, Faculty of Engineering, Osaka University, Suita, Osaka 565-0871, Japan*

<sup>b</sup> *RIKEN SPring-8 Center, Sayo-gun, Hyogo 679-5148, Japan*

### Contents

|                                                     |              |
|-----------------------------------------------------|--------------|
| <b><sup>1</sup>H and <sup>13</sup>C NMR Spectra</b> | <b>S2–S8</b> |
|-----------------------------------------------------|--------------|

[  $^1\text{H}$  and  $^{13}\text{C}$  NMR Spectra of **1** ]

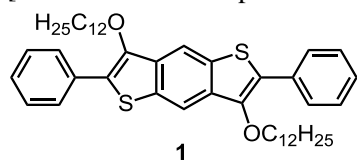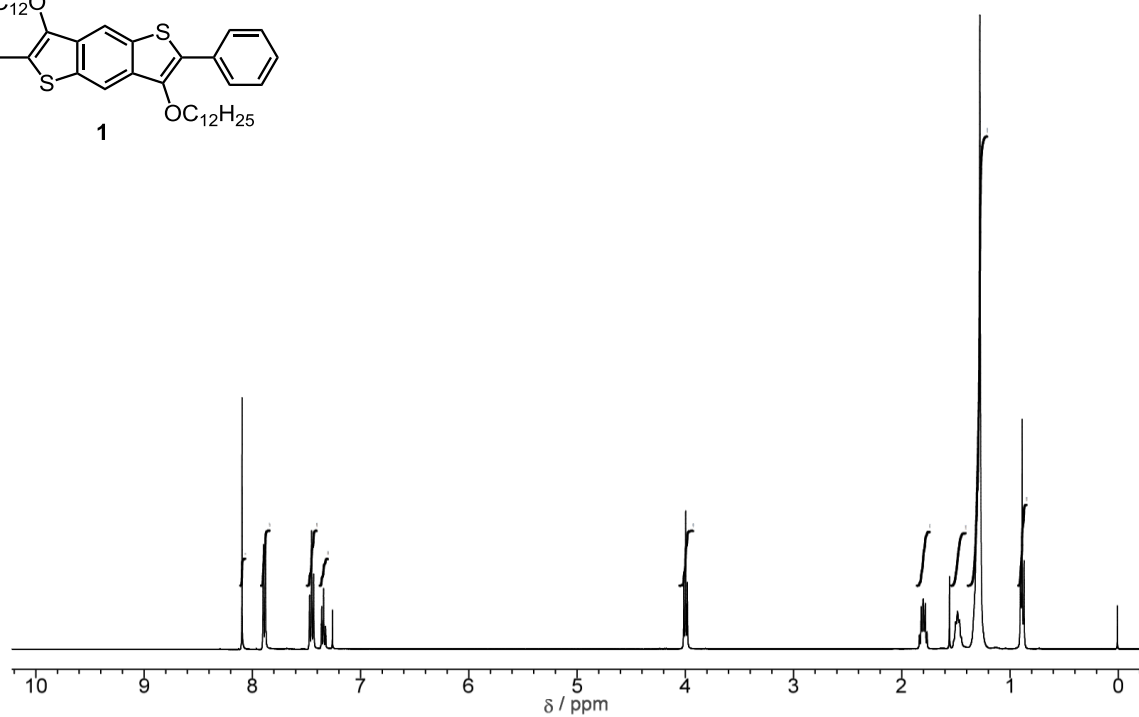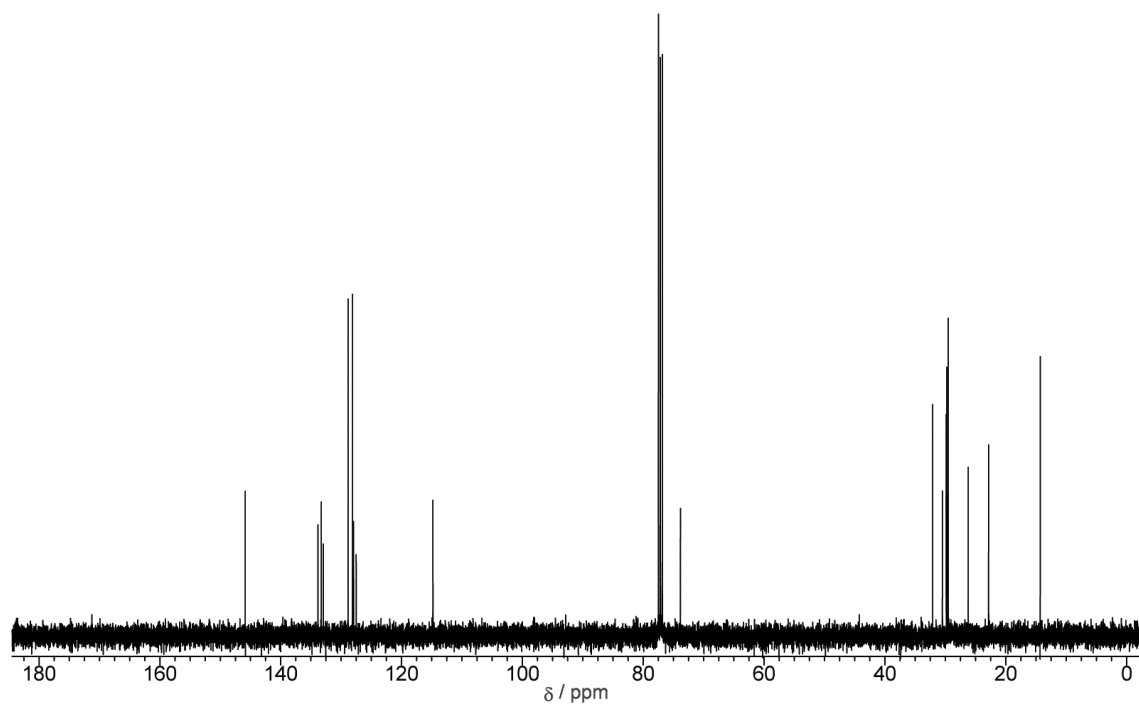

[  $^1\text{H}$  and  $^{13}\text{C}$  NMR Spectra of **2** ]

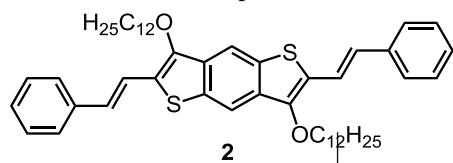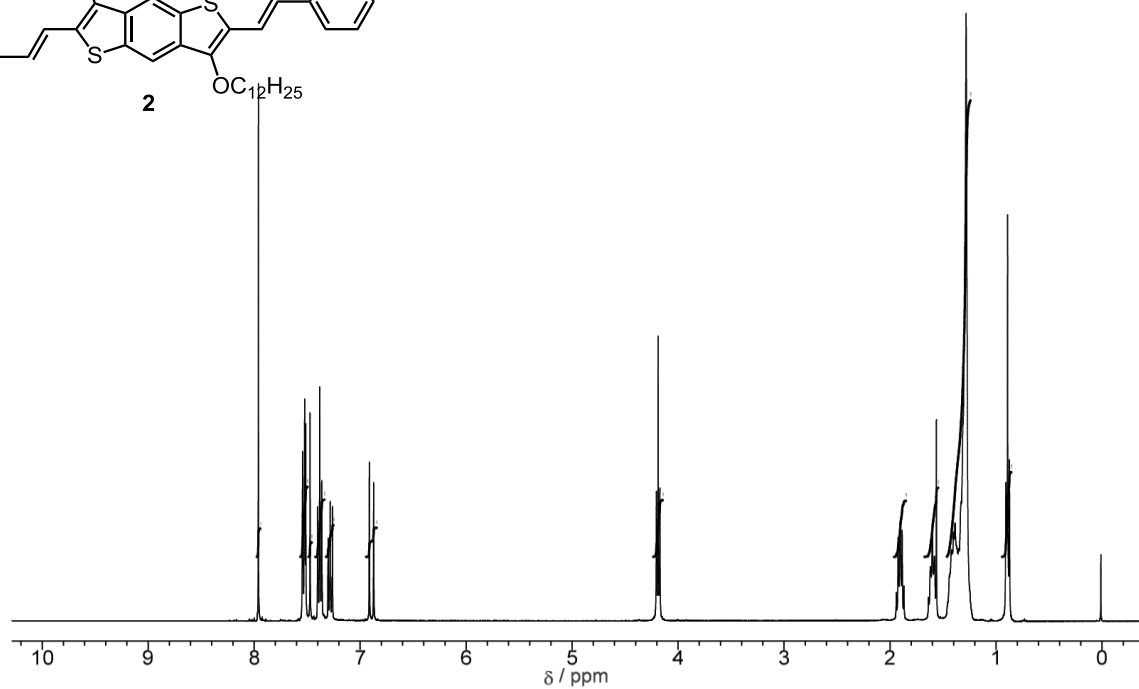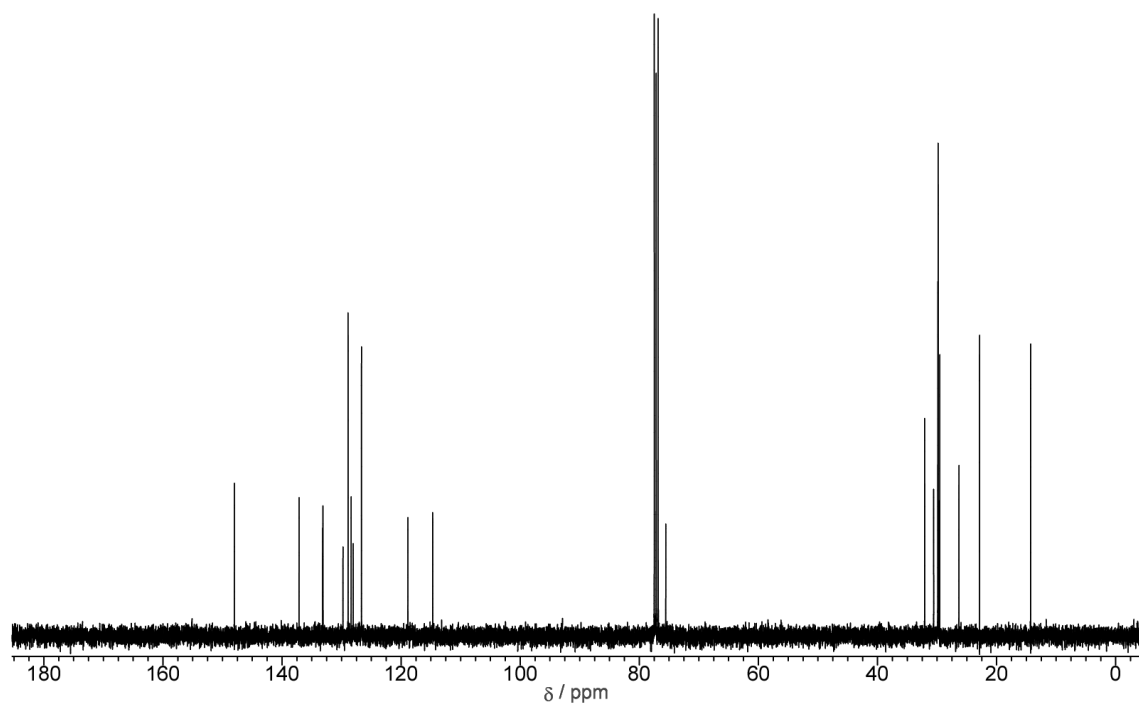

[  $^1\text{H}$  and  $^{13}\text{C}$  NMR Spectra of **9** ]

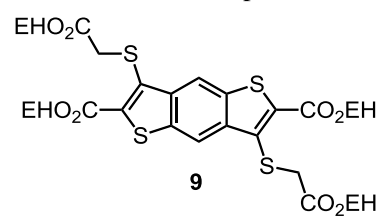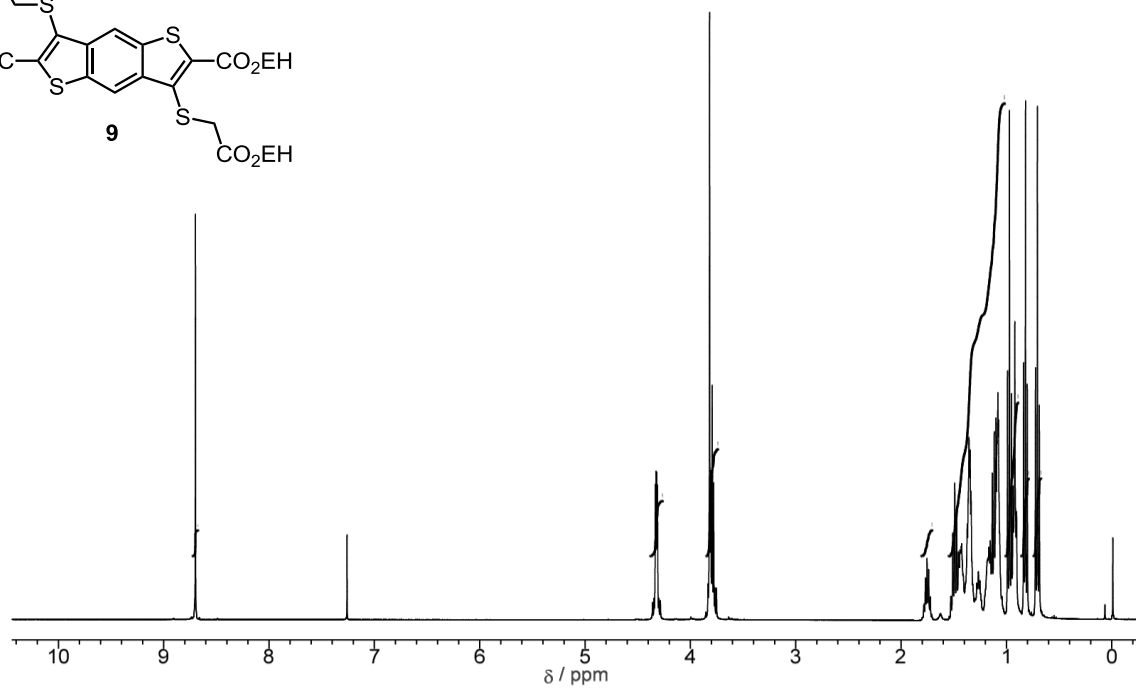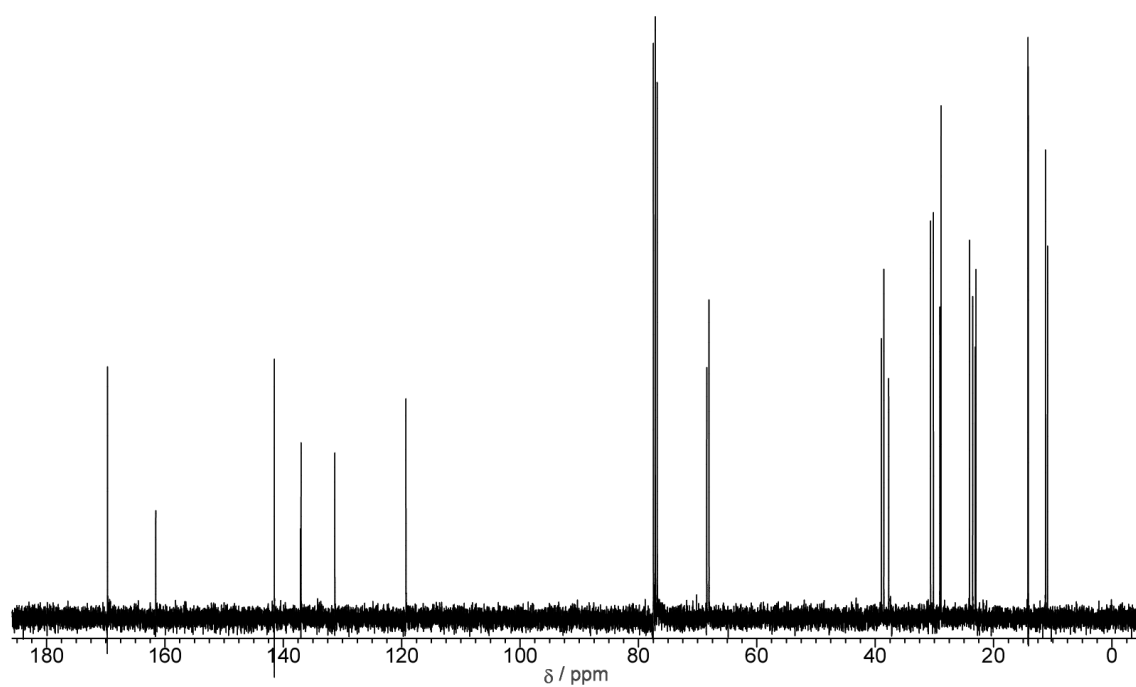

[  $^1\text{H}$  and  $^{13}\text{C}$  NMR Spectra of **10**]

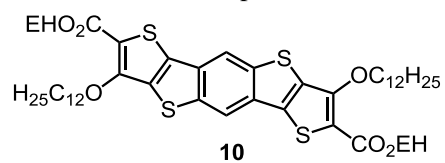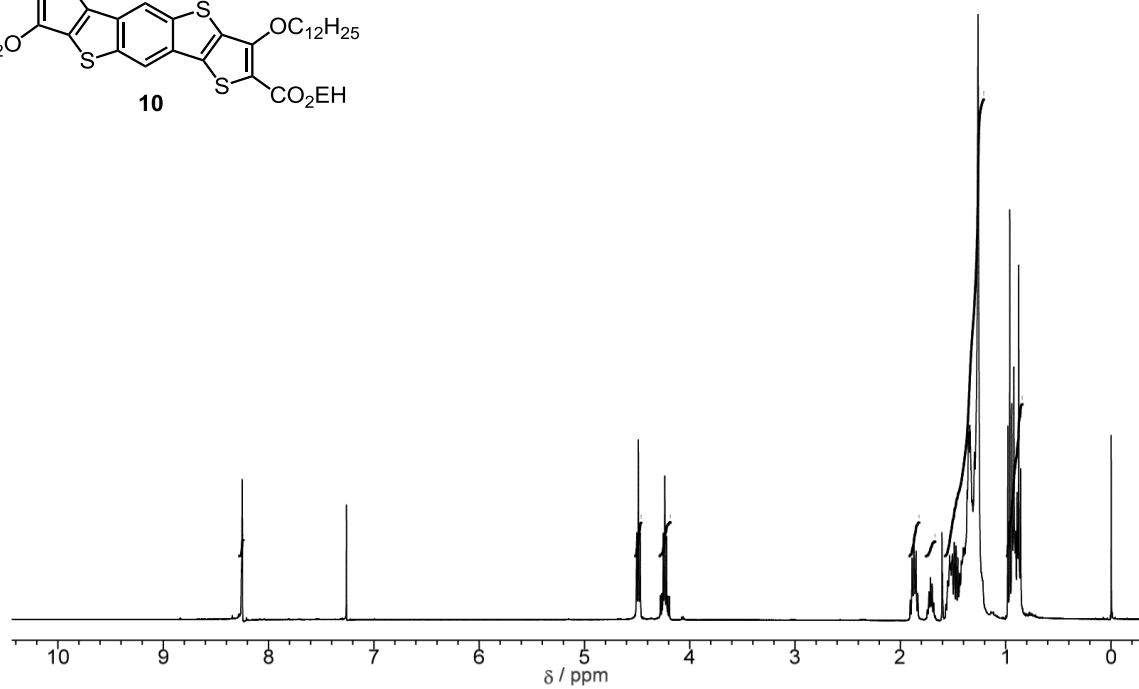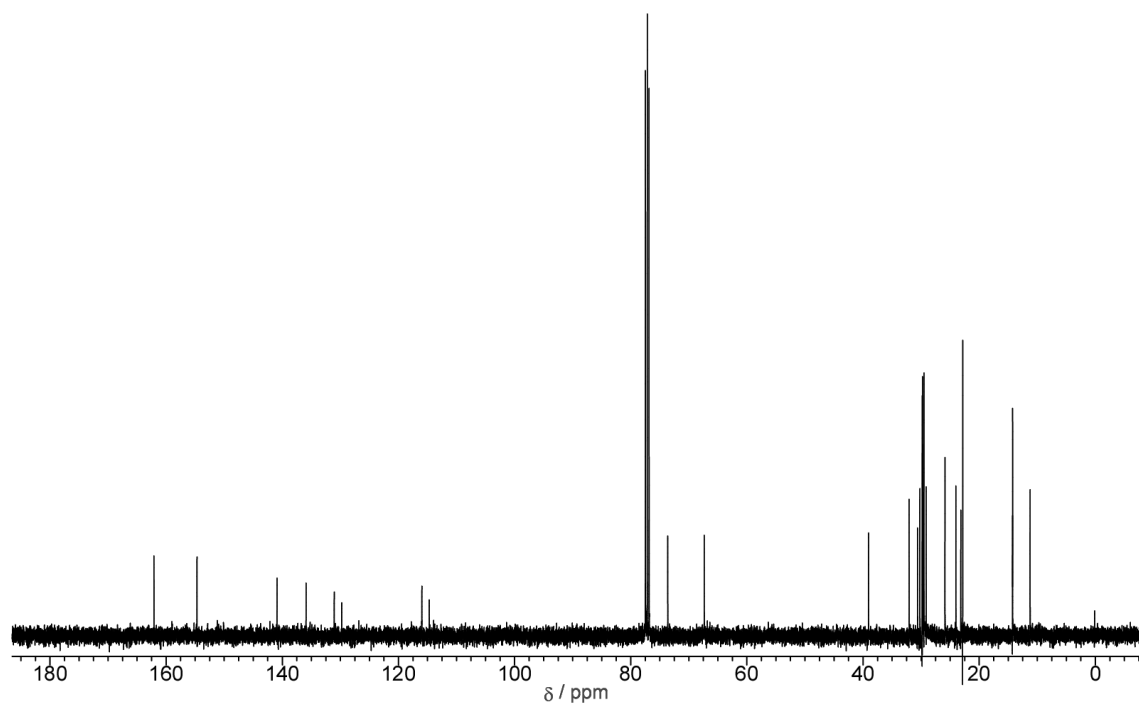

[  $^1\text{H}$  NMR Spectrum of **11** ]

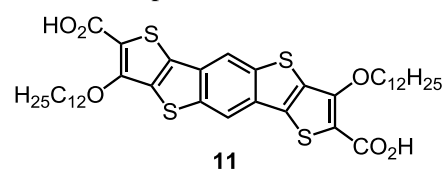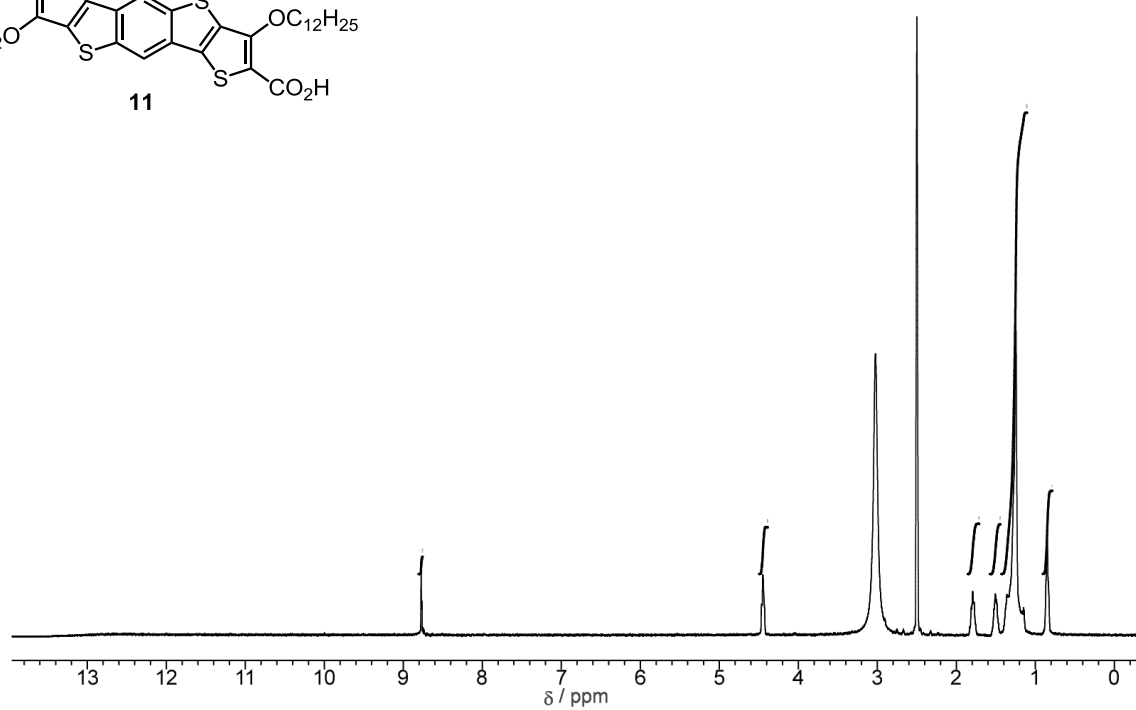

[  $^1\text{H}$  and  $^{13}\text{C}$  NMR Spectra of **3** ]

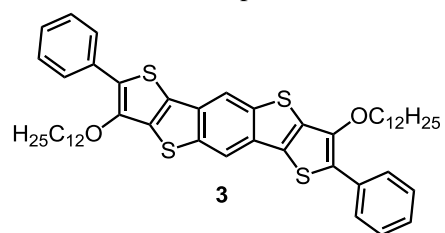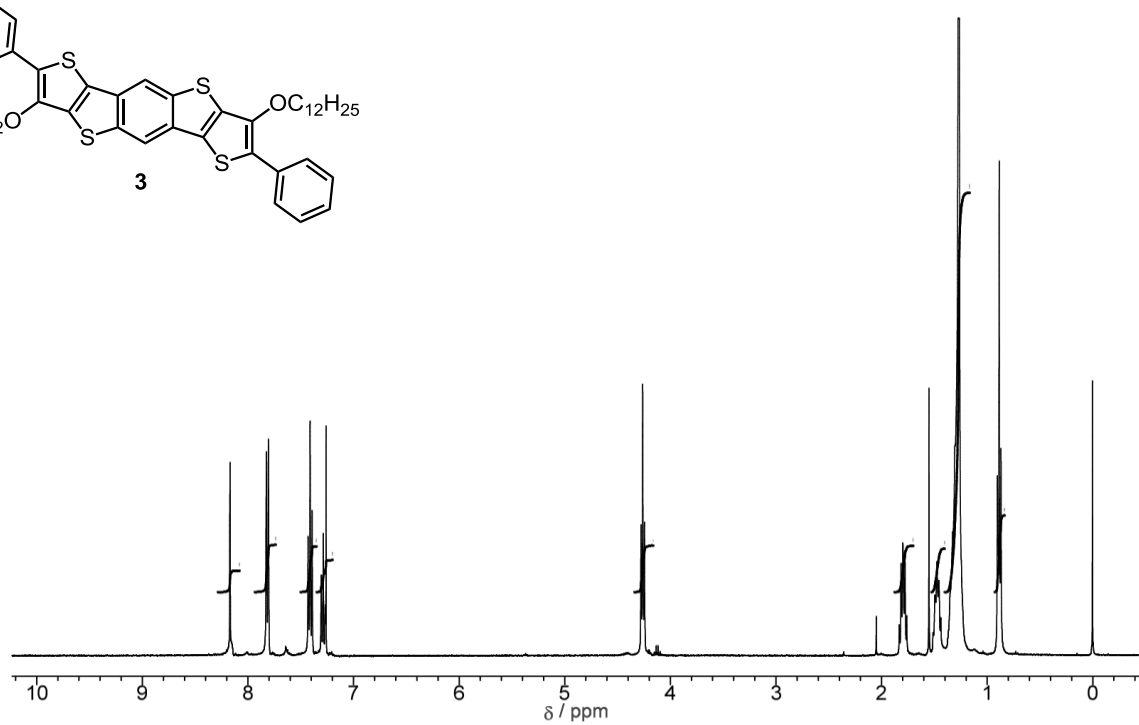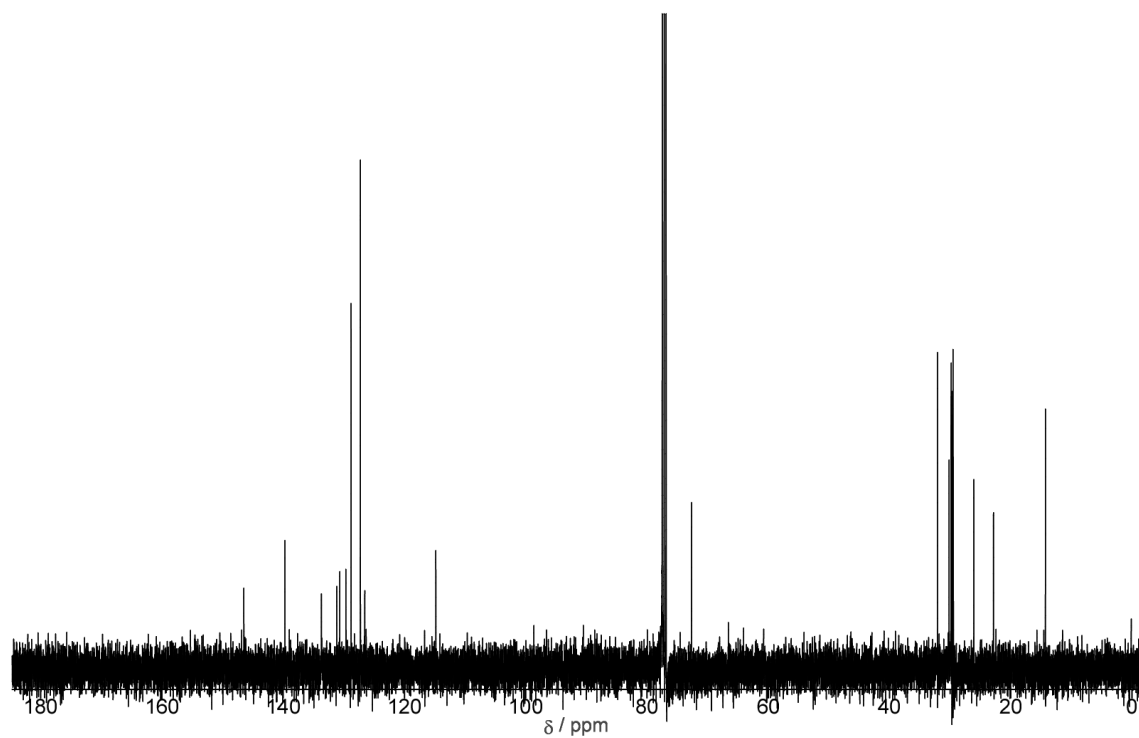

[  $^1\text{H}$  and  $^{13}\text{C}$  NMR Spectra of **4** ]

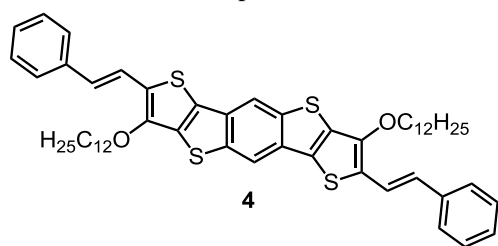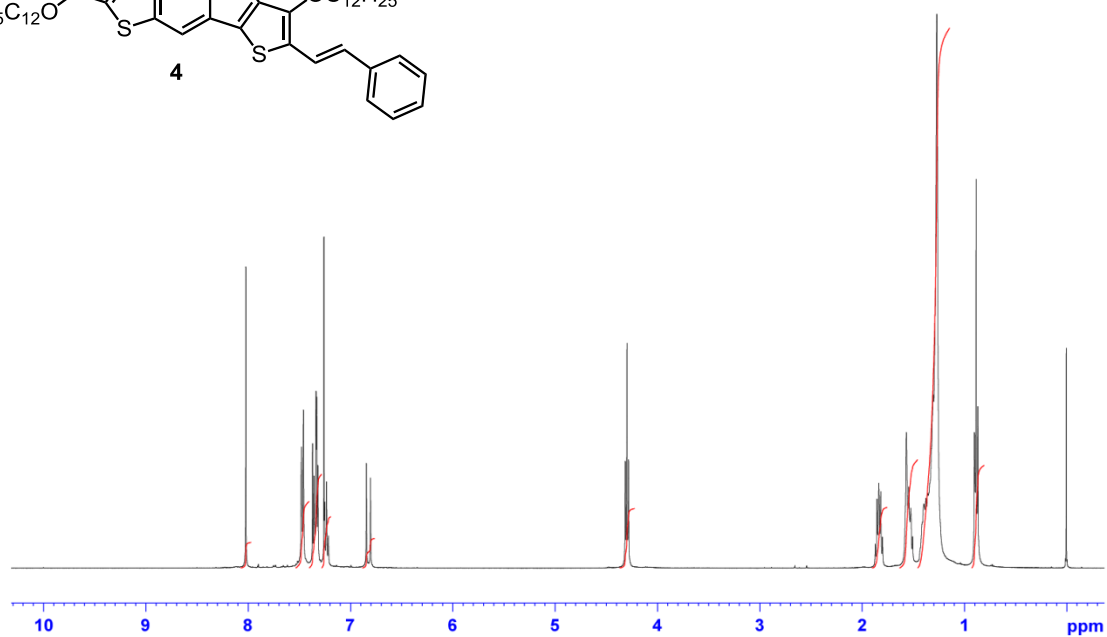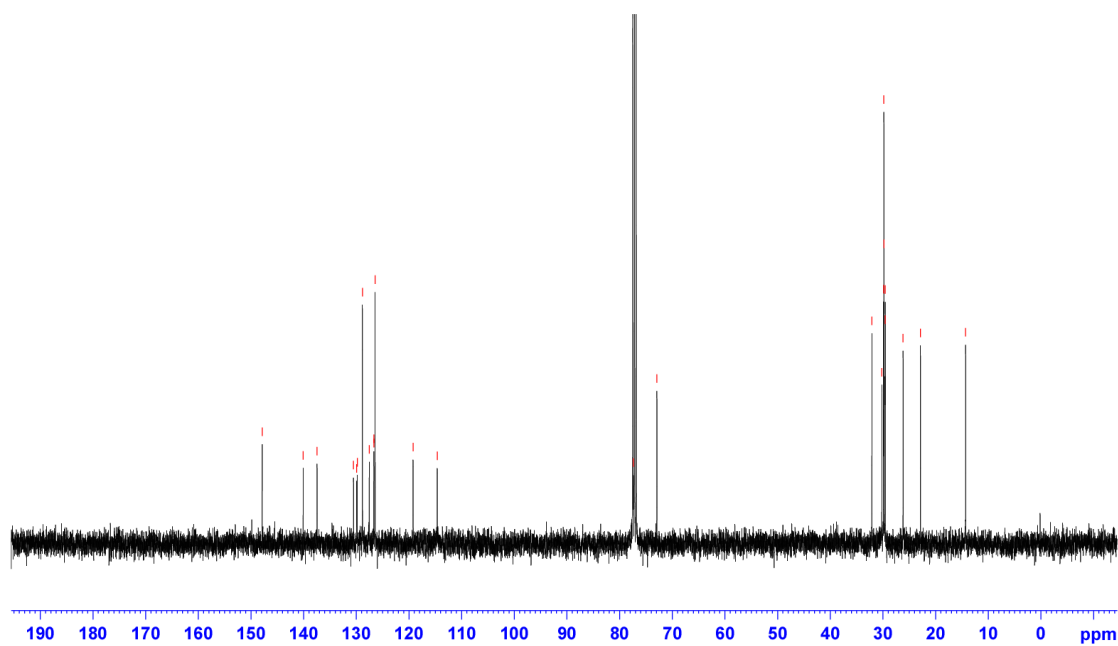

Supplement: c4cp03002h1.pdf [file c4cp03002h1.pdf]
